# Supplementary material for: Oral paracetamol versus oral ibuprofen for closure of haemodynamically significant patent ductus arteriosus in preterm neonates (<32 weeks): a blinded, randomised, active-controlled, non-inferiority trial
Source: PubMed Central journal article supplement — BMJ Paediatr Open. 2017 Aug 11;1(1):e000143. doi: 10.1136/bmjpo-2017-000143 (PMC5862198; doi:10.1136/bmjpo-2017-000143), 2017-08-11

# BMJ Paediatrics Open

BMJ Paediatrics Open is committed to open peer review. As part of this commitment we make the peer review history of every article we publish publicly available.

When an article is published we post the peer reviewers' comments and the authors' responses online. We also post the versions of the paper that were used during peer review. These are the versions that the peer review comments apply to.

The versions of the paper that follow are the versions that were submitted during the peer review process. They are not the versions of record or the final published versions. They should not be cited or distributed as the published version of this manuscript.

BMJ Paediatrics Open is an open access journal and the full, final, typeset and author-corrected version of record of the manuscript is available on our site with no access controls, subscription charges or pay-per-view fees (<http://bmjpaedsopen.bmj.com>).

If you have any questions on BMJ Paediatrics Open's open peer review process please email [info.bmjpo@bmj.com](mailto:info.bmjpo@bmj.com)

## BMJ Paediatrics Open

**Oral Paracetamol versus Oral Ibuprofen for closure of Hemodynamically Significant Patent Ductus Arteriosus in Preterm Neonates (<32 weeks): A Blinded Randomized Active Controlled Non-Inferiority Trial**

|                               |                                                                                                                                                                                                                                                                                                                                                                                                                                                                                                                                                                                                                                                                |
|-------------------------------|----------------------------------------------------------------------------------------------------------------------------------------------------------------------------------------------------------------------------------------------------------------------------------------------------------------------------------------------------------------------------------------------------------------------------------------------------------------------------------------------------------------------------------------------------------------------------------------------------------------------------------------------------------------|
| Journal:                      | <i>BMJ Paediatrics Open</i>                                                                                                                                                                                                                                                                                                                                                                                                                                                                                                                                                                                                                                    |
| Manuscript ID                 | bmjpo-2017-000143                                                                                                                                                                                                                                                                                                                                                                                                                                                                                                                                                                                                                                              |
| Article Type:                 | Protocol                                                                                                                                                                                                                                                                                                                                                                                                                                                                                                                                                                                                                                                       |
| Date Submitted by the Author: | 01-Jun-2017                                                                                                                                                                                                                                                                                                                                                                                                                                                                                                                                                                                                                                                    |
| Complete List of Authors:     | Kumar, Ashutosh; Postgraduate Institute of Medical Education and Research, Pediatrics<br>Sundaram, Venkateshan; Pediatrics; Postgraduate Institute of Medical Education and Research, Pediatrics<br>Yadav, Rahul; Fernandez Hospital, Pediatrics<br>Oleti, Tejo; Fernandez Hospital, Pediatrics<br>Murki, Srinivas; Fernandez Hospital, Pediatrics<br>Krishnan, Arun; Institute of Child Health, Neonatology<br>Sundaram, Mangalabharathi; Institute of Child Health, Neonatology<br>Saini, Shiv; Postgraduate Institute of Medical Education and Research, Pediatrics<br>Dutta, Sourabh; Postgraduate Institute of Medical Education and Research, Pediatrics |
| Keywords:                     | Cardiology, Circulatory, Imaging, Intensive Care, Neonatology                                                                                                                                                                                                                                                                                                                                                                                                                                                                                                                                                                                                  |
|                               |                                                                                                                                                                                                                                                                                                                                                                                                                                                                                                                                                                                                                                                                |

SCHOLARONE™  
Manuscripts

1  
2  
3  
4  
5  
6 **Title: Oral Paracetamol versus Oral Ibuprofen for closure of Hemodynamically Significant**  
7 **Patent Ductus Arteriosus in Preterm Neonates (<32 weeks): A Blinded Randomized Active**  
8 **Controlled Non-Inferiority Trial**  
9

10  
11  
12 **Authors**

13 Ashutosh Kumar, M.D <sup>1</sup>  
14 Venkateshan Sundaram, MD, DM <sup>1</sup>  
15 Rahul Yadav, M.D <sup>2</sup>  
16 Tejo Pratap Oleti, MD, DM <sup>2</sup>  
17 Srinivas Murki, MD, DM <sup>2</sup>  
18 Arun Krishna, M.D <sup>3</sup>  
19 Mangalabharathi Sundaram, M.D, D.M <sup>3</sup>  
20 Shiv Sajan Saini, MD, DM <sup>1</sup>  
21 Sourabh Dutta, MD, PhD <sup>1</sup>  
22  
23  
24  
25

26 **Affiliations:** <sup>1</sup>Division of Neonatology, Dept. of Pediatrics, Advanced Pediatrics Centre, Post  
27 Graduate Institute of Medical Education and Research, Chandigarh, India; <sup>2</sup>Department of  
28 Neonatology, Fernandez Hospital, Bogulakunta, Hyderabad, India; <sup>3</sup>Department of Neonatology,  
29 Institute of Child Health, Egmore, Chennai, India  
30  
31

32 Registry name: Clinical Trials Registry India

33 Trial identification number: CTRI/2014/08/004805  
34  
35  
36

37 **Corresponding author:**

38 Venkateshan Sundaram  
39 Associate Professor  
40 Division of Neonatology, Dept of Pediatrics  
41 Postgraduate Institute of Medical Education and Research  
42 Chandigarh, India, 160012  
43 E mail: [venkatpgi@gmail.com](mailto:venkatpgi@gmail.com)  
44 Phone: +91-9478001129  
45  
46  
47  
48  
49  
50  
51  
52  
53  
54  
55  
56  
57  
58  
59  
60

## Abstract

**Introduction:** Hemodynamically significant patent ductus arteriosus (HS-PDA) is a common cause of mortality and morbidities in preterm infants. Existing medical therapies with Ibuprofen or Indomethacin have multiple adverse effects prohibiting the clinicians to use them in many situations. Hence, an alternative drug like paracetamol given through oral route with less side effects need to be tested against the standard drugs in an appropriate study design with least risk of bias to arrive at a conclusion

**Methods and analysis: Design:** Multi-site, Randomized, active controlled, non-inferiority design. **Objective:** Primary objective-to study the efficacy of oral Paracetamol for closure of HS-PDA in comparison to oral Ibuprofen in preterm neonates of <32 weeks' gestation. Pre-defined criteria would be used for HS-PDA. Randomization- web based; Allocation concealment would be ensured; the treating team, investigators, outcome assessors and the laboratory personnel would be blinded from the nature of the intervention. Echocardiography images would be coded and archived for independent review. Closure of PDA by the end of the last dose of the study drug or earlier would be the study endpoint. A sample size of 196 neonates would be enrolled with a non-inferiority margin of 15%. Both intention to treat and per protocol analysis will be done to assess the effect of contamination and protocol violations in the primary outcome.

**Ethics and dissemination:** Search for an effective medical therapy with least side effects is crucial. Evidence for or against oral Paracetamol in comparison to the existing therapies is thin. The trial would follow international code of ethics for clinical trial and good clinical practices. All serious adverse events would be reported in detail to the Institute Ethics Committee. A written informed consent would be obtained from one of the parent. No plan has been made for dissemination.

**Registration number:** CTRI/2014/08/004805

**Key messages****A. What is known about this subject**

Ibuprofen and Indomethacin are the current standard drugs for closure of a Hemodynamically significant PDA apart from surgical ligation. These drugs have many adverse effects involving gut, kidneys and pulmonary vasculature. Few case reports and two clinical trials have reported about use of oral paracetamol for closure of PDA

**B. What this study adds**

We intend to compare oral paracetamol with oral Ibuprofen to demonstrate that paracetamol is not-inferior in efficacy and safer in comparison to Ibuprofen. This would be the largest multi-site non-inferiority trial where investigators, treating team, laboratory personnel and outcome assessors would be blinded

## Study background and rationale

Hemodynamically significant patent ductus arteriosus (hsPDA) is a common cause of morbidity and mortality among preterm infants (1, 2). Treatment options for the closure of hsPDA include pharmacological therapy and surgical ligation. Indomethacin and Ibuprofen, both block the conversion of arachidonic acid to prostaglandins, are the two most commonly used drugs for closure of PDA. (3, 4). The reported treatment success with ibuprofen for the management of hsPDA is between 70%-85% (5-8). Several adverse effects have been reported with such medications, including peripheral vasoconstriction, gastrointestinal bleeding and perforation, decreased platelet aggregation, hyperbilirubinemia, and renal failure (9, 10). Paracetamol (also known as acetaminophen), unlike Ibuprofen, acts on prostaglandin synthase at the peroxidase region of the enzyme (11). Paracetamol inhibition is facilitated by a decreased local concentration of hydroperoxides (12). The role of paracetamol as an alternative treatment for the closure of hsPDA has gained attention in recent years because of the potential side-effects of cyclooxygenase inhibitors (13-15). Five case series consisting of 39 patients had reported a PDA closure rate of 84-100% in neonates where treatment with indomethacin or Ibuprofen failed or were contraindicated (13, 14, 16, 17). One trial with 80 subjects concluded Oral Paracetamol is not superior to Oral Ibuprofen (18) whereas another trial with 160 subjects reported Oral Paracetamol not inferior to Oral Ibuprofen in closure of PDA (19). Considering the equivocal reports and the promise offered by paracetamol as a safer alternative, this randomized, active controlled, non-inferiority trial was planned.

## Research Question

Does Oral Paracetamol administered in a dose of 15 mg per kg birth body weight per dose every 6 hourly for consecutive 3 days would lead to a rate of closure of Patent Ductus Arteriosus (PDA) not inferior by a non-inferiority margin (D) of 15 % to administering Oral Ibuprofen in a dose of 10 mg per kg birth body weight per dose on day 1 and 5 mg per kg birth body weight per dose at 24 and 48 hr from the first dose administered consecutively in preterm neonates (<32 weeks) with evidence of hemodynamically significant (HS) PDA?

## Description of the study hypothesis

Null Hypothesis ( $H_0$ ):  $T - S \leq D$ ;

Alternate hypothesis (one-sided) ( $H_A$ ):  $T - S > D$

T – Rate of closure of PDA in the Test group that would receive Oral Paracetamol

S - Rate of closure of PDA in the Standard, active control group that would receive Oral Ibuprofen

D – Non-inferiority margin set at minus 15%

## Objectives

### *Primary objective*

To study the efficacy of Oral Paracetamol for closure of HS-PDA in comparison to Oral Ibuprofen in preterm neonates of <32 weeks gestation with evidence of HS-PDA

### *Secondary objectives*

To compare the following between Oral Paracetamol and Oral Ibuprofen groups:

- Time to closure of PDA
- Proportion of neonates where PDA closed following a single course
- Proportion of neonates who required surgical ligation for closure of PDA
- All-cause mortality before discharge from hospital
- Proportion of neonates where the PDA reopened

- Incidence of echocardiography proven pulmonary artery hypertension
- Duration of mechanical ventilation (in days)
- Duration of any respiratory support (in days)
- Duration of need for supplemental oxygen (in days)
- Incidences of azotemia, oliguria, hepatitis with deranged liver transaminases, deranged coagulogram, intraventricular hemorrhage (any grade of severity), severe intraventricular hemorrhage (grade 3 and intra-parenchymal extension), periventricular leukomalacia necrotizing enterocolitis (all stage), necrotizing enterocolitis (definite and advanced stage as per modified Bell's staging, feed intolerance, broncho-pulmonary dysplasia and retinopathy of prematurity

### Outcome measures

**Primary outcome measure:** Closure of PDA by the end of the last dose of the study drug or earlier, irrespective of the course of the drug

**Secondary outcome measures:**

- Closure of PDA following a single course of study drug
- Closure of PDA following surgical ligation
- Death (due to any cause) before discharge from the hospital
- Reopening of PDA following initial closure
- Echo proven pulmonary artery hypertension
- Azotemia, oliguria, hepatitis with deranged liver transaminases, deranged coagulogram, intraventricular hemorrhage (any grade of severity), severe intraventricular hemorrhage (grade 3 and intra-parenchymal extension), periventricular leukomalacia, necrotizing enterocolitis (all stage), necrotizing enterocolitis (definite and advanced stage as per modified Bell's staging), feed intolerance, broncho-pulmonary dysplasia, and retinopathy of prematurity



## Methodology

**Study design:** Randomized, two parallel arm, active controlled, blinded, non-inferiority trial

**Study place:** Newborn unit, Department of Pediatrics, PGIMER, Chandigarh

### **Eligibility criteria:**

a) Inborn preterm neonates < 32 weeks' gestation

b) Presence of a hemodynamically significant PDA\*

\*HS-PDA is defined if any one of the below mentioned clinical/biochemical sign is present in the presence of a PDA with a trans ductal diameter of  $\geq 1.6$  mm (or) in the presence of any one of the below mentioned echocardiographic sign suggestive of hemodynamic significance even in the absence of any of the below mentioned clinical/biochemical sign. A screening Echo would be done in all asymptomatic neonates to detect HS-PDA and this would be timed between 48-72 hours of age in infants 29-31 weeks and in the first 48 hours for that  $\leq 28$  weeks' gestation.

*Group A\*:* Signs of significant left  $\rightarrow$  right shunt: Hyperdynamic pulsatile precordium, bounding peripheral pulses, wide pulse pressure ( $>25$  mmHg)

*Group B:* Signs of systemic under-perfusion – poor peripheral pulse volume, prolonged capillary refill time, decreased urine output, deranged renal function test, metabolic acidosis, and hypotension

*Group C:* Signs of pulmonary over-perfusion – abnormal weight gain, increase in liver size, new onset or increase in ventilatory requirements that primarily involves PEEP, PIP and FiO<sub>2</sub>, respiratory acidosis, pulmonary crepitations, hemorrhagic pulmonary edema

\*In the presence of a clinical sign that falls under Group A, a second trained neonatologist would be asked to confirm the clinical sign and the sign would be present only if both examiners concur; wide pulse pressure must be recorded on two consecutive blood pressure measurements

Echocardiographic features indicative of HS-PDA:

A trans-ductal diameter of  $\geq 1.5$  mm plus one of the following:

- Evidence of left atrial enlargement (LA: Ao root diameter ratio  $\geq 1.4$ )
- Ductal velocity  $< 2$  meters/sec
- Antegrade main pulmonary artery diastolic flow  $> 20$  cm/sec
- E: A ratio  $> 1$
- Isovolemic relaxation time (IVRT)  $\leq 45$  milliseconds
- Absent or reversed diastolic blood flow pattern in descending thoracic aorta

***Exclusion criteria:***

1. Antenatally or postnatally suspected or diagnosed structural heart disease
2. Presence of major congenital malformations
3. Contraindication for enteral feeding
4. Contraindication for administration of any one of the study drugs such as Blood Urea  $> 60$ mg/dl, serum creatinine level  $> 1.6$  mg/ dl, platelet count  $< 60000$ /mm<sup>3</sup>, clinical bleeding from any site, deranged coagulogram, clinical or radiological evidence of necrotizing enterocolitis, intra-ventricular hemorrhage of moderate to severe grade severity (grade III with or without intra-parenchymal extension) or progression of intra-ventricular hemorrhage demonstrated in an earlier ultrasound, hyperbilirubinemia within 2 mg/dl from the exchange transfusion cut-off value
5. Refusal of consent

## ***Enrollment process (Figure 1)***

### ***Consent:***

One of the parents would be approached for consent to allow their newborn infant to participate in this clinical trial. The parents will be provided a detailed parent information sheet and will also receive a verbal explanation about the study. Neonates will be enrolled only after obtaining written informed consent from one of the parents. Parents would be allowed to withdraw their neonate from the study at any stage.

### **Intervention and comparison groups**

***Intervention:*** Paracetamol oral suspension (Calpol, Glaxo Smithkline Asia Pvt Ltd) would be administered through an oro-gastric tube in a dose of 15 mg/kg/dose at 6 hourly intervals for three consecutive days. The drug would be filled in 5 ml plastic syringes and would be gently pushed through the oro-gastric tube followed by a flush of 1 ml of sterile water for injection

***Active control:*** Ibuprofen oral suspension (Ibugesic, Cipla India Ltd.) would be administered through oro-gastric tubes in a dose of 10 mg/kg/dose followed by 5 mg/kg/dose after 24 and 48 hours from the first dose. A similar drug administration technique would be followed as stated above

### **Allocation process**

Web based random allocation would be done within each of the three strata (<28 weeks, 28-29 and 30-31 weeks) (<http://www.randomization.com>). A block randomization would be done with blocks of variable sizes within each stratum. Separate personnel who are not involved in any aspect of the trial would do the random allocation.

### **Allocation concealment and blinding**

The drugs would be prepared and dispensed by the clinical pharmacy department of the Institute. The drugs would be dispensed in 5 ml volumes in separate vials as per the group of allocations. Allocation concealment would be ensured by serially numbering the vials with a randomly generated code number corresponding to the sequence of allocation. The drugs would be prepared to have a similar color, flavor, and viscosity to prevent identification of the study drug

1  
2  
3 and would be dispensed on opaque plastic vials. The blinding process would be tested by  
4 administering the dispensed drugs to adult volunteers to assess whether they can differentiate the  
5 drugs based on the color, flavor, taste and viscosity of the preparations. To avoid recognizing the  
6 study drug due to difference in their respective dosage and frequency schedules, the  
7 concentration of the drugs would be modified in such a way that administering equal volume of  
8 the drug at a time point would ensure appropriate dosing of that drug for that time point. The  
9 final concentration that would be achieved would be 1ml=15 mg for paracetamol and 1ml=10 mg  
10 for Ibuprofen. Moreover, as once daily schedule would be followed for Ibuprofen, a similar  
11 resembling placebo (inert agent) would be used to complete a sham 6 hourly dosing schedule in  
12 case of the Ibuprofen group. This process would be ensured by having a set of 24 vials (12 vials  
13 for first course and 12 more for the second course) for each enrolled neonate with the vials  
14 clearly marked with the code number, sequence of enrollment, and the day of therapy on the vial  
15 label. For the second course, vials marked day 4, 5, and 6 would be used. No drug from an  
16 already opened vial would be reused for the next day therapy. This whole process would keep  
17 the treating team, investigators, outcome assessors and the laboratory personnel blinded from the  
18 nature of the intervention. Moreover, the outcome assessors would be further blinded by coding  
19 the echo images stored in the system for assessment of ductal closure.  
20  
21  
22  
23  
24  
25  
26  
27  
28  
29  
30  
31  
32  
33  
34

### 35 **Determination of ductus arteriosus status by echocardiography (Figure 2 & 3):**

36 Daily echocardiographic assessments would be done till completion of the course or till the  
37 closure of the PDA, whichever is earlier. A PDA would be considered as closed if there is no  
38 demonstrable open ductus and the color Doppler demonstrates no flow across the ductus  
39 arteriosus region. After 24 hours from the completion or earlier in case clinical signs appear, a  
40 repeat echocardiogram would be done to assess for reopening of PDA. The echocardiogram  
41 images and clips would be code numbered and archived for review VS or SS. SD will  
42 maintain the key to the code numbers.  
43  
44  
45  
46  
47  
48  
49

### 50 **Technique of transthoracic echocardiography**

51 The Echocardiographic assessments will be done using a SonoSite MicroMaxx Portable  
52 Ultrasound Machine (Fujifilm Sonosite Inc. Bothell, WA 98021, USA); Philips CX-50  
53 machine (Philips Healthcare, Massachusetts, USA) in site 2 and Esaote MyLab 5 (Esaote Inc.  
54 Genova, Italy) in site 3. A cardiac probe of 8-12 MHz frequency will be utilized for the study.  
55  
56  
57  
58  
59  
60

1  
2  
3 Before the procedure, the probe head will be cleaned and cold-disinfected with 2%  
4 glutaraldehyde solution. Three standard views would be optimized for visualization of the  
5 ductus arteriosus – subxiphoid, high parasternal (ductal) and aortic arch (suprasternal) views.  
6 Presence of ductus in a 2-D would always be crosschecked using a color Doppler  
7 superimposition. Transductal diameter would be measured preferably in a 2-D in a high  
8 parasternal cut. To maintain uniformity, the diameter measurement will be done at the  
9 narrowest point by 2-D imaging, which is usually at the pulmonary end of the ductus  
10 arteriosus, where it constricts first. Color Doppler mapping would be used to visualize the  
11 direction of shunt blood flow. Ductal velocity would be assessed using pulsed wave Doppler  
12 (PWD) positioned at the pulmonary end of the ductus. Similarly, PWD would be used to  
13 assess the antegrade flow in diastole in the main pulmonary artery (MPA). M-mode would be  
14 used to measure the left atrial: aortic root diameter ratio. PWD with range gate would be  
15 placed transmitrally for E: A ratio and between the mitral and aortic valves for IVRT. Left  
16 ventricular output (LVO), right ventricular output (RVO) and superior vena cava (SVC) flow  
17 would be measured using the formula:  $[VTI (cm) \times \pi \times (D/2)^2 \times \text{heart rate}] / \text{birth weight (kg)}$ .  
18 Velocity Time Integral (VTI) will be calculated based on PWD across the left ventricle outflow  
19 tract for LVO, right ventricular outflow tract for RVO, and SVC for SVC flow. The descending  
20 aorta would be visualized in the suprasternal view and using Continuous Wave (CW) Doppler  
21 the flow direction in diastole would be calculated for aortic run-off.  
22  
23  
24  
25  
26  
27  
28  
29  
30  
31  
32  
33  
34  
35  
36  
37  
38

39 **Training of the principal investigator:** The principal investigator (PI) in each site would be  
40 formally evaluated over a period of 1 month preceded by a hands-on training session. During the  
41 training session, PI would be trained by one of the co-investigators who have experience in  
42 performing neonatal functional echocardiographic assessments (VS and SS). During the  
43 evaluation period, the PI would record 50 images and video clips from 50 different neonates with  
44 20% of them being normal neonates. VS or SS would review these images for correctness of  
45 image acquisition and diagnosis. The PI would be considered trained to perform independent  
46 Echocardiography for the research purpose when he gets >90% of the images correct. At the end  
47 of evaluation, 10 out of 50 images would be repeated by co investigators VS or SS to check for  
48 inter-observer variability.  
49  
50  
51  
52  
53  
54  
55  
56  
57  
58  
59  
60

### Sample size estimation and statistical analysis:

The observed rate of PDA closure by oral Ibuprofen was 85% (20). Assuming an equal rate of closure for oral paracetamol with a non-inferiority margin of 15%, one sided alpha error of 5% and power of 90%, 196 neonates would be required in this trial. The primary outcome (binary) of rate of closure of PDA will be compared between the study groups by calculating the relative risk and risk difference and would be expressed as 95% C.I. Baseline variables would be compared between the study groups using Chi-square test for categorical variables and student 't' test or an appropriate nonparametric test for numerical variables. Time to closure of PDA would be compared by a Kaplan-Meier curve and significance will be tested by log rank test. Both intention to treat and per protocol analysis will be done to assess the effect of contamination and protocol violations on the primary outcome. Apart from hypothesis testing for non-inferiority using the non-inferiority margin assumed, the 95% CI of the probability of closure of PDA would be marked to establish or reject non-inferiority of Paracetamol in comparison to oral ibuprofen. A 'p' value of 0.05 would be considered significant. IBM-SPSS v.20 will be used for data entry and statistical analysis.



**References**

1. Hermes-DeSantis ER, Clyman RI. Patent ductus arteriosus: pathophysiology and management. *J Perinatol.* 2006;26 Suppl 1:S14-8; discussion S22-3.
2. Van Overmeire B, Chemtob S. The pharmacologic closure of the patent ductus arteriosus. *Semin Fetal Neonatal Med.* 2005;10(2):177-84.
3. Noori S. Patent ductus arteriosus in the preterm infant: to treat or not to treat? *J Perinatol.* 2010;30 Suppl:S31-7.
4. Demirel G, Erdeve O, Dilmen U. Pharmacological Management of PDA: oral versus intravenous medications. *Curr Clin Pharmacol.* 2012;7(4):263-70.
5. Gokmen T, Erdeve O, Altug N, Oguz SS, Uras N, Dilmen U. Efficacy and safety of oral versus intravenous ibuprofen in very low birth weight preterm infants with patent ductus arteriosus. *J Pediatr.* 2011;158(4):549-54 e1.
6. Erdeve O, Yurttutan S, Altug N, Ozdemir R, Gokmen T, Dilmen U, et al. Oral versus intravenous ibuprofen for patent ductus arteriosus closure: a randomised controlled trial in extremely low birthweight infants. *Arch Dis Child Fetal Neonatal Ed.* 2012;97(4):F279-83.
7. Erdeve O, Yurttutan S, Ozdemir R, Dilmen U. Oral ibuprofen for treatment of patent ductus arteriosus: more than a cheap alternative? *Neonatology.* 2012;102(3):196; author reply
8. Erdeve O, Gokmen T, Altug N, Dilmen U. Oral versus intravenous ibuprofen: which is better in closure of patent ductus arteriosus? *Pediatrics.* 2009;123(4):e763.
9. Zecca E, Romagnoli C, De Carolis MP, Costa S, Marra R, De Luca D. Does Ibuprofen increase neonatal hyperbilirubinemia? *Pediatrics.* 2009;124(2):480-4.
10. Erdeve O, Sarici SU, Sari E, Gok F. Oral-ibuprofen-induced acute renal failure in a preterm infant. *Pediatr Nephrol.* 2008;23(9):1565-7.
11. Green K, Drvota V, Vesterqvist O. Pronounced reduction of in vivo prostacyclin synthesis in humans by acetaminophen (paracetamol). *Prostaglandins.* 1989;37(3):311-5.
12. Lucas R, Warner TD, Vojnovic I, Mitchell JA. Cellular mechanisms of acetaminophen: role of cyclo-oxygenase. *FASEB J.* 2005;19(6):635-7.
13. Oncel MY, Yurttutan S, Degirmencioglu H, Uras N, Altug N, Erdeve O, et al. Intravenous paracetamol treatment in the management of patent ductus arteriosus in extremely low birth weight infants. *Neonatology.* 2013;103(3):166-9.
14. Hammerman C, Bin-Nun A, Markovitch E, Schimmel MS, Kaplan M, Fink D. Ductal closure with paracetamol: a surprising new approach to patent ductus arteriosus treatment. *Pediatrics.* 2011;128(6):e1618-21.
15. Oncel MY, Yurttutan S, Uras N, Altug N, Ozdemir R, Ekmen S, et al. An alternative drug (paracetamol) in the management of patent ductus arteriosus in ibuprofen-resistant or contraindicated preterm infants. *Arch Dis Child Fetal Neonatal Ed.* 2013;98(1):F94.
16. Yurttutan S, Oncel MY, Arayici S, Uras N, Altug N, Erdeve O, et al. A different first-choice drug in the medical management of patent ductus arteriosus: oral paracetamol. *J Matern Fetal Neonatal Med.* 2013;26(8):825-7.
17. Sinha R, Negi V, Dalal SS. An Interesting Observation of PDA Closure with Oral Paracetamol in Preterm Neonates. *J Clin Neonatol.* 2013;2(1):30-2.
18. Oncel MY, Yurttutan S, Erdeve O, Uras N, Altug N, Oguz SS, et al. Oral Paracetamol versus Oral Ibuprofen in the Management of Patent Ductus Arteriosus in Preterm Infants: A Randomized Controlled Trial. *J Pediatr.* 2014;164(3):510-4 e1.
19. Dang D, Wang D, Zhang C, Zhou W, Zhou Q, Wu H. Comparison of oral paracetamol versus ibuprofen in premature infants with patent ductus arteriosus: a randomized controlled trial. *PLoS One.* 2013;8(11):e77888.
20. Lin XZ, Chen HQ, Zheng Z, Li YD, Lai JD, Huang LH. [Therapeutic effect of early administration of oral ibuprofen in very low birth weight infants with patent ductus arteriosus]. *Zhongguo Dang Dai Er Ke Za Zhi.* 2012;14(7):502-5.

1  
2  
3  
4  
5  
6  
7  
8  
9  
10  
11  
12  
13  
14  
15  
16  
17  
18  
19  
20  
21  
22  
23  
24  
25  
26  
27  
28  
29  
30  
31  
32  
33  
34  
35  
36  
37  
38  
39  
40  
41  
42  
43  
44  
45  
46  
47  
48  
49  
50  
51  
52  
53  
54  
55  
56  
57  
58  
59  
60

Figure 1: Study flow as per the CONSORT recommendations

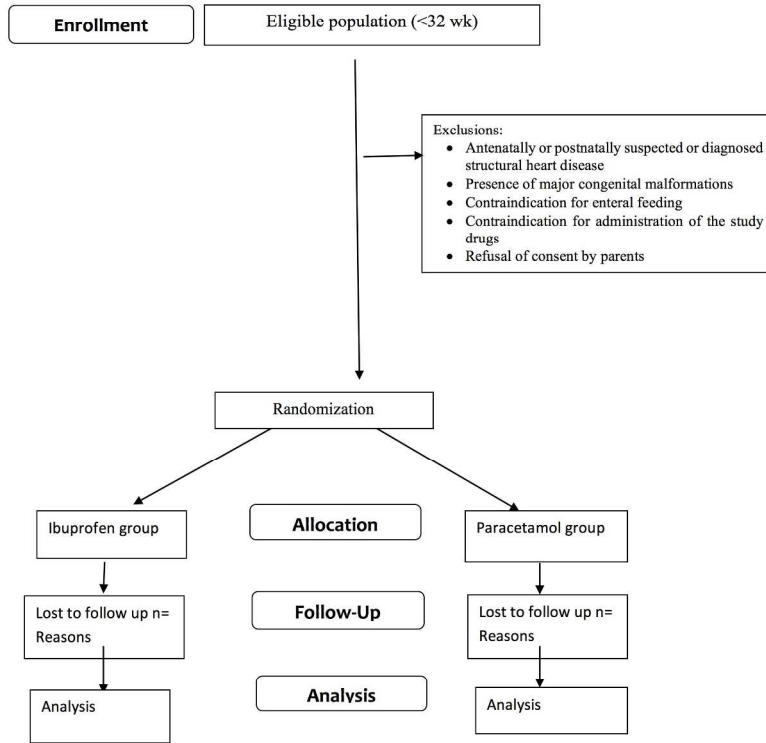

215x279mm (300 x 300 DPI)

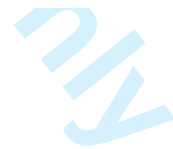



1  
2  
3  
4  
5  
6  
7  
8  
9  
10  
11  
12  
13  
14  
15  
16  
17  
18  
19  
20  
21  
22  
23  
24  
25  
26  
27  
28  
29  
30  
31  
32  
33  
34  
35  
36  
37  
38  
39  
40  
41  
42  
43  
44  
45  
46  
47  
48  
49  
50  
51  
52  
53  
54  
55  
56  
57  
58  
59  
60

**Figure 2: Operational flow and time line of the study**

Step 1: Eligible neonate (<32 weeks with clinical signs suggestive of HS-PDA and in the first 2 weeks of age or directly screened for Echo proven HS-PDA) identified and first Echo done (Zero-hour echo)

Step 2: Structural abnormality of heart ruled out by the investigators (even suspicion of a structural heart disease would make them not eligible)

Step 3: Exclusion criteria applied (certain investigations like platelet count and renal function tests – sent and results acquired within the next 6 hours)

Step 4: Randomized to one of the study groups (time of randomization in hours and the age at diagnosis - age at randomization difference noted)

Step 5: Study drug administered as per the random allocation (the age at intervention and the randomization – intervention interval noted)

Step 6: Repeat echo's (Echo 1, 2, and 3) done at  $24 \pm 4$  hours' interval) on 1<sup>st</sup>, 2<sup>nd</sup>, and 3<sup>rd</sup> day drug dose for closure of PDA

Step 7: If Ductus still open on Echo 3, repeat course of the same study drug of same duration would be started and the Echo would be repeated as per the first course schedule

Step 8: The Ductus would be finally labeled as failed to close based on Echo 6, which would be done at the end of the last dose of the second course of the study drug

Note: The first course would be completed even though a ductal closure is documented earlier. However, if a baby required a second course, the drug would be stopped the moment a ductal closure has been documented at any point during the daily Echocardiographic assessments

215x279mm (300 x 300 DPI)

BMJ

1  
2  
3  
4  
5  
6  
7  
8  
9  
10  
11  
12  
13  
14  
15  
16  
17  
18  
19  
20  
21  
22  
23  
24  
25  
26  
27  
28  
29  
30  
31  
32  
33  
34  
35  
36  
37  
38  
39  
40  
41  
42  
43  
44  
45  
46  
47  
48  
49  
50  
51  
52  
53  
54  
55  
56  
57  
58  
59  
60

**Figure 3: Time line of assessments by Bedside Echocardiography**

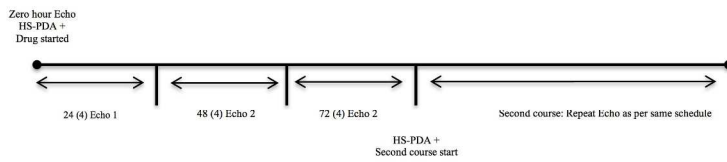

215x279mm (300 x 300 DPI)

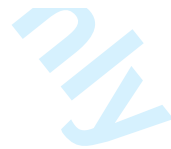

## BMJ Paediatrics Open

**Oral Paracetamol versus Oral Ibuprofen for closure of Hemodynamically Significant Patent Ductus Arteriosus in Preterm Neonates (<32 weeks): A Blinded Randomized Active Controlled Non-Inferiority Trial**

|                               |                                                                                                                                                                                                                                                                                                                                                                                                                                                                                                                                                                                                                                                                |
|-------------------------------|----------------------------------------------------------------------------------------------------------------------------------------------------------------------------------------------------------------------------------------------------------------------------------------------------------------------------------------------------------------------------------------------------------------------------------------------------------------------------------------------------------------------------------------------------------------------------------------------------------------------------------------------------------------|
| Journal:                      | <i>BMJ Paediatrics Open</i>                                                                                                                                                                                                                                                                                                                                                                                                                                                                                                                                                                                                                                    |
| Manuscript ID                 | bmjpo-2017-000143.R1                                                                                                                                                                                                                                                                                                                                                                                                                                                                                                                                                                                                                                           |
| Article Type:                 | Protocol                                                                                                                                                                                                                                                                                                                                                                                                                                                                                                                                                                                                                                                       |
| Date Submitted by the Author: | 10-Jul-2017                                                                                                                                                                                                                                                                                                                                                                                                                                                                                                                                                                                                                                                    |
| Complete List of Authors:     | Kumar, Ashutosh; Postgraduate Institute of Medical Education and Research, Pediatrics<br>Sundaram, Venkateshan; Pediatrics; Postgraduate Institute of Medical Education and Research, Pediatrics<br>Yadav, Rahul; Fernandez Hospital, Pediatrics<br>Oleti, Tejo; Fernandez Hospital, Pediatrics<br>Murki, Srinivas; Fernandez Hospital, Pediatrics<br>Krishnan, Arun; Institute of Child Health, Neonatology<br>Sundaram, Mangalabharathi; Institute of Child Health, Neonatology<br>Saini, Shiv; Postgraduate Institute of Medical Education and Research, Pediatrics<br>Dutta, Sourabh; Postgraduate Institute of Medical Education and Research, Pediatrics |
| Keywords:                     | Cardiology, Circulatory, Imaging, Intensive Care, Neonatology                                                                                                                                                                                                                                                                                                                                                                                                                                                                                                                                                                                                  |
|                               |                                                                                                                                                                                                                                                                                                                                                                                                                                                                                                                                                                                                                                                                |

SCHOLARONE™  
Manuscripts

1  
2  
3  
4  
5  
6 **Title: Oral Paracetamol versus Oral Ibuprofen for closure of Hemodynamically Significant**  
7 **Patent Ductus Arteriosus in Preterm Neonates (<32 weeks): A Blinded Randomized Active**  
8 **Controlled Non-Inferiority Trial**  
9

10  
11  
12 **Authors**

13 Ashutosh Kumar, M.D <sup>1</sup>  
14 Venkateshan Sundaram, MD, DM <sup>1</sup>  
15 Rahul Yadav, M.D <sup>2</sup>  
16 Tejo Pratap Oleti, MD, DM <sup>2</sup>  
17 Srinivas Murki, MD, DM <sup>2</sup>  
18 Arun Krishna, M.D <sup>3</sup>  
19 Mangalabharathi Sundaram, M.D, D.M <sup>3</sup>  
20 Shiv Sajan Saini, MD, DM <sup>1</sup>  
21 Sourabh Dutta, MD, PhD <sup>1</sup>  
22  
23  
24  
25

26 **Affiliations:** <sup>1</sup>Division of Neonatology, Dept. of Pediatrics, Advanced Pediatrics Centre, Post  
27 Graduate Institute of Medical Education and Research, Chandigarh, India; <sup>2</sup>Department of  
28 Neonatology, Fernandez Hospital, Bogulakunta, Hyderabad, India; <sup>3</sup>Department of Neonatology,  
29 Institute of Child Health, Egmore, Chennai, India  
30  
31

32 Registry name: Clinical Trials Registry India

33 Trial identification number: CTRI/2014/08/004805  
34  
35  
36

37 **Corresponding author:**

38 Venkateshan Sundaram  
39 Associate Professor  
40 Division of Neonatology, Dept. of Pediatrics  
41 Postgraduate Institute of Medical Education and Research  
42 Chandigarh, India, 160012  
43 E mail: [venkatpgi@gmail.com](mailto:venkatpgi@gmail.com)  
44 Phone: +91-9478001129  
45  
46  
47  
48  
49  
50  
51  
52  
53  
54  
55  
56  
57  
58  
59  
60

## Abstract

**Introduction:** Hemodynamically significant patent ductus arteriosus (HS-PDA) is a common cause of mortality and morbidities in preterm infants. Existing medical therapies with Ibuprofen or Indomethacin have multiple adverse effects. Hence, an alternative drug like paracetamol given through oral route with less side effects need to be tested in an appropriate study design with least risk of bias to arrive at a conclusion

**Methods and analysis:** Multi-site, Randomized, active controlled, non-inferiority design. Primary objective-to study the efficacy of oral paracetamol for closure of HS-PDA in comparison to oral ibuprofen in preterm neonates of <32 weeks' gestation. Randomization- web based; Allocation concealment would be done; the treating team, investigators, outcome assessors and laboratory personnel would be blinded from the intervention. Echocardiography images would be coded for independent review. Closure of PDA by the end of last dose of study drug or earlier would be the study endpoint. A sample size of 196 neonates would be enrolled with a non-inferiority margin of 15%. Both intention to treat and per protocol analysis will be done to assess the effect of contamination and protocol violations in the primary outcome.

**Ethics and dissemination:** The trial would follow international code of ethics for clinical trial. The trial protocol was approved by the Institute Ethics Committee of all three centres. All serious adverse events would be reported in detail to the Institute Ethics Committee. A written informed consent would be obtained from one of the parent. No plan has been made for dissemination.

**Registration number:** CTRI/2014/08/004805

**Key messages****A. What is known about this subject**

Ibuprofen and Indomethacin are the current standard drugs for closure of a Hemodynamically significant PDA apart from surgical ligation. These drugs have many adverse effects involving gut, kidneys and pulmonary vasculature. Few case reports and two clinical trials have reported about use of oral paracetamol for closure of PDA

**B. What this study adds**

We intend to compare oral paracetamol with oral ibuprofen to demonstrate that paracetamol is not-inferior in efficacy and safer in comparison to ibuprofen. This would be the largest multi-site, non-inferiority trial where investigators, treating team, laboratory personnel and outcome assessors would be blinded to the intervention

## Study background and rationale

Hemodynamically significant patent ductus arteriosus (hsPDA) is a common cause of morbidity and mortality in preterm neonates (1, 2). Treatment options for the closure of hsPDA include pharmacological therapy and surgical ligation. Indomethacin and Ibuprofen, both inhibit the conversion of arachidonic acid to prostaglandins, are the two most commonly used drugs for closure of PDA (3, 4). Ibuprofen has been reported to successfully close hsPDA in 70-85% cases (5-8). However, several serious adverse effects have been reported with both Indomethacin and Ibuprofen which includes intense peripheral vasoconstriction, gastrointestinal bleeding and perforation, decreased platelet aggregation, hyperbilirubinemia, and renal failure (9, 10). Paracetamol (also known as acetaminophen), unlike Ibuprofen, acts on prostaglandin synthase at the peroxidase region of the enzyme (11). Paracetamol mediated inhibition of the peroxidase region enzyme was reported to be further facilitated by decreased local concentration of hydroperoxides (12). The role of paracetamol as an alternative treatment for closure of hsPDA has gained attention in recent years because of its superior safety profile in comparison to the cyclooxygenase inhibitors (13-15). Five case series together consisting of 39 neonates who received paracetamol for significant PDA (where Indomethacin and Ibuprofen were contraindicated) had reported a closure rate of 84-100% (13, 14, 16, 17). A clinical trial comparing oral paracetamol with oral Ibuprofen in 80 preterm neonates concluded that oral paracetamol was not superior to oral Ibuprofen (18) whereas another trial with 160 preterm neonates reported that oral paracetamol was not inferior to oral Ibuprofen in closure of PDA (19). A Cochrane database systematic review of two low quality unmasked studies that enrolled 250 infants (above two studies) showed no significant difference between treatment with oral paracetamol versus oral ibuprofen for failure of ductal closure after the first course of drug administration (typical relative risk (RR) 0.90, 95% confidence interval (CI) 0.67 to 1.22) (20). There were also no significant differences between the paracetamol and the ibuprofen groups in the secondary outcomes except for 'duration for need of supplemental oxygen' and for hyperbilirubinemia, both in favor of paracetamol. However, both the studies included were graded down by the review group as low in quality using the GRADE process. Another recent systematic review of sixteen studies (2 randomized controlled trials and 14 uncontrolled studies) concluded that the efficacy and safety of paracetamol appear to be comparable with those of ibuprofen. However, the authors cautioned about the non-optimal quality of the studies analyzed

1  
2  
3 and the limited number of neonates treated with paracetamol so far and advised for additional  
4 well designed studies to support the use of paracetamol for PDA in current clinical practice (21).  
5 A recent report has reinforced the long-term neurodevelopmental safety of paracetamol in  
6 comparison to ibuprofen in 80 preterm neonates (22). Considering the equivocal reports  
7 published until now and the promise offered by paracetamol as a safer alternative, this  
8 randomized, active controlled, masked, non-inferiority trial was planned.  
9  
10  
11  
12  
13  
14  
15  
16  
17  
18  
19  
20  
21  
22  
23  
24  
25  
26  
27  
28  
29  
30  
31  
32  
33  
34  
35  
36  
37  
38  
39  
40  
41  
42  
43  
44  
45  
46  
47  
48  
49  
50  
51  
52  
53  
54  
55  
56  
57  
58  
59  
60



## Research Question

Does oral paracetamol administered in a dose of 15 mg per kg per dose every 6 hourly for 3 consecutive days would be associated with a rate of closure of Patent Ductus Arteriosus (PDA) not inferior by a non-inferiority margin (D) of 15 % in comparison to oral ibuprofen in a dose of 10 mg per kg per dose on day 1 and 5 mg per kg per dose at 24 and 48 hours from the first dose in preterm neonates (<32 weeks) with evidence of hemodynamically significant (HS) PDA?

## Description of the study hypothesis

Null Hypothesis ( $H_0$ ):  $T - S \leq D$ ;

Alternate hypothesis (one-sided) ( $H_A$ ):  $T - S > D$

T – Rate of closure of PDA in the test group that would receive oral paracetamol

S - Rate of closure of PDA in the standard, active control group that would receive oral ibuprofen

D – Non-inferiority margin set at minus 15%

## Objectives

### *Primary objective*

To study the efficacy of Oral Paracetamol for closure of HS-PDA in comparison to Oral Ibuprofen in preterm neonates of <32 weeks' gestation with evidence of HS-PDA

### *Secondary objectives*

To compare the following between Oral Paracetamol and Oral Ibuprofen groups:

- Time to closure of PDA
- Proportion of neonates where PDA closed following a single course
- Proportion of neonates who required surgical ligation for closure of PDA
- All-cause mortality before discharge from hospital
- Proportion of neonates where the PDA reopened
- Incidence of echocardiography proven pulmonary artery hypertension

- Duration of mechanical ventilation (in days)
- Duration of any respiratory support (in days)
- Duration of need for supplemental oxygen (in days)
- Incidences of azotemia, oliguria, hepatitis with deranged liver transaminases, deranged coagulogram, intraventricular hemorrhage (any grade of severity), severe intraventricular hemorrhage (grade 3 and intra-parenchymal extension), periventricular leukomalacia, necrotizing enterocolitis (all stage), necrotizing enterocolitis (definite and advanced stage as per modified Bell's staging, feed intolerance, broncho-pulmonary dysplasia and retinopathy of prematurity)

### Outcome measures

**Primary outcome measure:** Closure of PDA by the end of the last dose of the study drug or earlier, irrespective of the course of the drug

### Secondary outcome measures:

- Closure of PDA following a single course of study drug
- Closure of PDA following surgical ligation
- Death (due to any cause) before discharge from the hospital
- Reopening of PDA following initial closure
- Echo proven pulmonary artery hypertension
- Azotemia, oliguria, hepatitis with deranged liver transaminases, deranged coagulogram, intraventricular hemorrhage (any grade of severity), severe intraventricular hemorrhage (grade 3 and intra-parenchymal extension), periventricular leukomalacia, necrotizing enterocolitis (all stage), necrotizing enterocolitis (definite and advanced stage as per modified Bell's staging), feed intolerance, broncho-pulmonary dysplasia, and retinopathy of prematurity

## Methodology

**Study design:** Randomized, two parallel arm, active controlled, blinded, non-inferiority trial

**Study place:** Newborn unit, Department of Pediatrics, PGIMER, Chandigarh

### **Eligibility criteria:**

a) Inborn preterm neonates < 32 weeks' gestation

b) Presence of a hemodynamically significant PDA\*

\*HS-PDA is defined if any one of the below mentioned clinical/biochemical sign is present in the presence of a PDA with a trans ductal diameter of  $\geq 1.6$  mm (or) in the presence of any one of the below mentioned echocardiographic sign suggestive of hemodynamic significance even in the absence of any of the below mentioned clinical/biochemical sign. A screening Echo would be done in all asymptomatic neonates to detect HS-PDA and this would be timed between 48-72 hours of age in infants 29-31 weeks and in the first 48 hours for that  $\leq 28$  weeks' gestation.

*Group A\*:* Signs of significant left  $\rightarrow$  right shunt: Hyperdynamic pulsatile precordium, bounding peripheral pulses, wide pulse pressure ( $>25$  mmHg)

*Group B:* Signs of systemic under-perfusion – poor peripheral pulse volume, prolonged capillary refill time, decreased urine output, deranged renal function test, metabolic acidosis, and hypotension

*Group C:* Signs of pulmonary over-perfusion – abnormal weight gain, increase in liver size, new onset or increase in ventilatory requirements that primarily involves PEEP, PIP and FiO<sub>2</sub>, respiratory acidosis, pulmonary crepitations, hemorrhagic pulmonary edema

\*In the presence of a clinical sign that falls under Group A, a second trained neonatologist would be asked to confirm the clinical sign and the sign would be present only if both examiners concur; wide pulse pressure must be recorded on two consecutive blood pressure measurements

Echocardiographic features indicative of HS-PDA:

A trans-ductal diameter of  $\geq 1.5$  mm plus one of the following:

- Evidence of left atrial enlargement (LA: Ao root diameter ratio  $\geq 1.4$ )
- Ductal velocity  $< 2$  meters/sec
- Antegrade main pulmonary artery diastolic flow  $> 20$  cm/sec
- E: A ratio  $> 1$
- Isovolemic relaxation time (IVRT)  $\leq 45$  milliseconds
- Absent or reversed diastolic blood flow pattern in descending thoracic aorta

***Exclusion criteria:***

1. Antenatally or postnatally suspected or diagnosed structural heart disease
2. Presence of major congenital malformations
3. Contraindication for enteral feeding
4. Contraindication for administration of any one of the study drugs such as Blood Urea  $> 60$ mg/dl, serum creatinine level  $> 1.6$  mg/ dl, platelet count  $< 60000$ /mm<sup>3</sup>, clinical bleeding from any site, deranged coagulogram, clinical or radiological evidence of necrotizing enterocolitis, intra-ventricular hemorrhage of moderate to severe grade severity (grade III with or without intra-parenchymal extension) or progression of intra-ventricular hemorrhage demonstrated in an earlier ultrasound, hyperbilirubinemia within 2 mg/dl from the exchange transfusion cut-off value
5. Refusal of consent

## Enrollment process (Figure 1)

### *Consent:*

One of the parents would be approached for consent to allow their newborn infant to participate in this clinical trial. The parents will be provided a detailed parent information sheet and will also receive a verbal explanation about the study. Neonates will be enrolled only after obtaining written informed consent from one of the parents. Parents would be allowed to withdraw their neonate from the study at any stage.

### **Intervention and comparison groups**

*Intervention:* Paracetamol oral suspension (Calpol, Glaxo Smithkline Asia Pvt Ltd) would be administered through an oro-gastric tube in a dose of 15 mg/kg/dose at 6 hourly intervals for three consecutive days. The drug would be filled in 5 ml plastic syringes and would be gently pushed through the oro-gastric tube followed by a flush of 1 ml of sterile water for injection

*Active control:* Ibuprofen oral suspension (Ibugesic, Cipla India Ltd.) would be administered through oro-gastric tubes in a dose of 10 mg/kg/dose followed by 5 mg/kg/dose after 24 and 48 hours from the first dose. A similar drug administration technique would be followed as stated above

### **Allocation process**

Web based random allocation would be done within each of the three strata (<28 weeks, 28-29 and 30-31 weeks) (<http://www.randomization.com>). A block randomization would be done with blocks of variable sizes within each stratum. Separate personnel who are not involved in any aspect of the trial would do the random allocation.

### **Allocation concealment and blinding**

The drugs would be prepared and dispensed by the clinical pharmacy department of the Institute. The drugs would be dispensed in 5 ml volumes in separate vials as per the group of allocations. Allocation concealment would be ensured by serially numbering the vials with a randomly generated code number corresponding to the sequence of allocation. The drugs would be prepared to have a similar color, flavor, and viscosity to prevent identification of the study drug and would be dispensed on opaque plastic vials. The blinding process would be tested by administering the dispensed drugs to adult volunteers to assess whether they can differentiate the

1  
2  
3 drugs based on the color, flavor, taste and viscosity of the preparations. To avoid recognizing the  
4 study drug due to difference in their respective dosage and frequency schedules, the  
5 concentration of the drugs would be modified in such a way that administering equal volume of  
6 the drug at a time point would ensure appropriate dosing of that drug for that time point. The  
7 final concentration that would be achieved would be 1ml=15 mg for paracetamol and 1ml=10 mg  
8 for Ibuprofen. Moreover, as once daily schedule would be followed for Ibuprofen, a similar  
9 resembling placebo (inert agent) would be used to complete a sham 6 hourly dosing schedule in  
10 case of the Ibuprofen group. This process would be ensured by having a set of 24 vials (12 vials  
11 for first course and 12 more for the second course) for each enrolled neonate with the vials  
12 clearly marked with the code number, sequence of enrollment, and the day of therapy on the vial  
13 label. For the second course, vials marked day 4, 5, and 6 would be used. No drug from an  
14 already opened vial would be reused for the next day therapy. This whole process would keep  
15 the treating team, investigators, outcome assessors and the laboratory personnel blinded from the  
16 nature of the intervention. Moreover, the outcome assessors would be further blinded by coding  
17 the echo images stored in the system for assessment of ductal closure.

### 30 **Determination of ductus arteriosus status by echocardiography (Figure 2 & 3):**

31 Daily echocardiographic assessments would be done till completion of the course or till the  
32 closure of the PDA, whichever is earlier. A PDA would be considered as closed if there is no  
33 demonstrable open ductus and the color Doppler demonstrates no flow across the ductus  
34 arteriosus region. After 24 hours from the completion or earlier in case clinical signs appear, a  
35 repeat echocardiogram would be done to assess for reopening of PDA. The echocardiogram  
36 images and clips would be code numbered and archived for review VS or SS. SD will  
37 maintain the key to the code numbers.

### 45 **Technique of transthoracic echocardiography**

46 The Echocardiographic assessments will be done using a SonoSite MicroMaxx Portable  
47 Ultrasound Machine (Fujifilm Sonosite Inc. Bothell, WA 98021, USA); Philips CX-50  
48 machine (Philips Healthcare, Massachusetts, USA) in site 2 and Esaote MyLab 5 (Esaote Inc.  
49 Genova, Italy) in site 3. A cardiac probe of 8-12 MHz frequency will be utilized for the study.  
50 Before the procedure, the probe head will be cleaned and cold-disinfected with 2%  
51 glutaraldehyde solution. Three standard views would be optimized for visualization of the  
52 ductus arteriosus – subxiphoid, high parasternal (ductal) and aortic arch (suprasternal) views.  
53  
54  
55  
56  
57  
58  
59  
60

1  
2  
3 Presence of ductus in a 2-D would always be crosschecked using a color Doppler  
4 superimposition. Transductal diameter would be measured preferably in a 2-D in a high  
5 parasternal cut. To maintain uniformity, the diameter measurement will be done at the  
6 narrowest point by 2-D imaging, which is usually at the pulmonary end of the ductus  
7 arteriosus, where it constricts first. Color Doppler mapping would be used to visualize the  
8 direction of shunt blood flow. Ductal velocity would be assessed using pulsed wave Doppler  
9 (PWD) positioned at the pulmonary end of the ductus. Similarly, PWD would be used to  
10 assess the antegrade flow in diastole in the main pulmonary artery (MPA). M-mode would be  
11 used to measure the left atrial: aortic root diameter ratio. PWD with range gate would be  
12 placed transmitrally for E: A ratio and between the mitral and aortic valves for IVRT. Left  
13 ventricular output (LVO), right ventricular output (RVO) and superior vena cava (SVC) flow  
14 would be measured using the formula:  $[VTI (cm) \times \pi \times (D/2)^2 \times \text{heart rate}] / \text{birth weight (kg)}$ .  
15 Velocity Time Integral (VTI) will be calculated based on PWD across the left ventricle outflow  
16 tract for LVO, right ventricular outflow tract for RVO, and SVC for SVC flow. The descending  
17 aorta would be visualized in the suprasternal view and using Continuous Wave (CW) Doppler  
18 the flow direction in diastole would be calculated for aortic run-off.

19  
20  
21 **Training of the principal investigator:** The principal investigator (PI) in each site would be  
22 formally evaluated over a period of 1 month preceded by a hands-on training session. During the  
23 training session, PI would be trained by one of the co-investigators who have experience in  
24 performing neonatal functional echocardiographic assessments (VS and SS). During the  
25 evaluation period, the PI would record 50 images and video clips from 50 different neonates with  
26 20% of them being normal neonates. VS or SS would review these images for correctness of  
27 image acquisition and diagnosis. The PI would be considered trained to perform independent  
28 Echocardiography for the research purpose when he gets >90% of the images correct. At the end  
29 of evaluation, 10 out of 50 images would be repeated by co investigators VS or SS to check for  
30 inter-observer variability.  
31  
32  
33  
34  
35  
36  
37  
38  
39  
40  
41  
42  
43  
44  
45  
46  
47  
48  
49  
50  
51  
52  
53  
54  
55  
56  
57  
58  
59  
60



**Sample size estimation and statistical analysis:**

The observed rate of PDA closure by oral Ibuprofen was 85% (23). Assuming an equal rate of closure for oral paracetamol with a non-inferiority margin of 15%, one sided alpha error of 5% and power of 90%, 196 neonates would be required in this trial. The primary outcome (binary) of rate of closure of PDA will be compared between the study groups by calculating the relative risk and risk difference and would be expressed as 95% C.I. Baseline variables would be compared between the study groups using Chi-square test for categorical variables and student 't' test or an appropriate nonparametric test for numerical variables. Time to closure of PDA would be compared by a Kaplan-Meier curve and significance will be tested by log rank test. Both intention to treat and per protocol analysis will be done to assess the effect of contamination and protocol violations on the primary outcome. Apart from hypothesis testing for non-inferiority using the non-inferiority margin assumed, the 95% CI of the probability of closure of PDA would be marked to establish or reject non-inferiority of Paracetamol in comparison to oral ibuprofen. A 'p' value of 0.05 would be considered significant. IBM-SPSS v.20 will be used for data entry and statistical analysis.



**Ethics and dissemination:**

The trial would follow international code of ethics for clinical trial and good clinical practices (GCP). The trial protocol has been approved by the Institute Ethics Committee of all the three centres. All serious adverse events would be reported in detail to the Institute Ethics Committee. A written informed consent would be obtained from one of the parent. No plan has been made for dissemination.

Confidential: For Review Only

## References

1. Hermes-DeSantis ER, Clyman RI. Patent ductus arteriosus: pathophysiology and management. *J Perinatol*. 2006;26 Suppl 1:S14-8; discussion S22-3.
2. Van Overmeire B, Chemtob S. The pharmacologic closure of the patent ductus arteriosus. *Semin Fetal Neonatal Med*. 2005;10(2):177-84.
3. Noori S. Patent ductus arteriosus in the preterm infant: to treat or not to treat? *J Perinatol*. 2010;30 Suppl:S31-7.
4. Demirel G, Erdeve O, Dilmen U. Pharmacological Management of PDA: oral versus intravenous medications. *Curr Clin Pharmacol*. 2012;7(4):263-70.
5. Gokmen T, Erdeve O, Altug N, Oguz SS, Uras N, Dilmen U. Efficacy and safety of oral versus intravenous ibuprofen in very low birth weight preterm infants with patent ductus arteriosus. *J Pediatr*. 2011;158(4):549-54 e1.
6. Erdeve O, Yurttutan S, Altug N, Ozdemir R, Gokmen T, Dilmen U, et al. Oral versus intravenous ibuprofen for patent ductus arteriosus closure: a randomised controlled trial in extremely low birthweight infants. *Arch Dis Child Fetal Neonatal Ed*. 2012;97(4):F279-83.
7. Erdeve O, Yurttutan S, Ozdemir R, Dilmen U. Oral ibuprofen for treatment of patent ductus arteriosus: more than a cheap alternative? *Neonatology*. 2012;102(3):196; author reply
8. Erdeve O, Gokmen T, Altug N, Dilmen U. Oral versus intravenous ibuprofen: which is better in closure of patent ductus arteriosus? *Pediatrics*. 2009;123(4):e763.
9. Zecca E, Romagnoli C, De Carolis MP, Costa S, Marra R, De Luca D. Does Ibuprofen increase neonatal hyperbilirubinemia? *Pediatrics*. 2009;124(2):480-4.
10. Erdeve O, Sarici SU, Sari E, Gok F. Oral-ibuprofen-induced acute renal failure in a preterm infant. *Pediatr Nephrol*. 2008;23(9):1565-7.
11. Green K, Drvota V, Vesterqvist O. Pronounced reduction of in vivo prostacyclin synthesis in humans by acetaminophen (paracetamol). *Prostaglandins*. 1989;37(3):311-5.
12. Lucas R, Warner TD, Vojnovic I, Mitchell JA. Cellular mechanisms of acetaminophen: role of cyclo-oxygenase. *FASEB J*. 2005;19(6):635-7.
13. Oncel MY, Yurttutan S, Degirmencioglu H, Uras N, Altug N, Erdeve O, et al. Intravenous paracetamol treatment in the management of patent ductus arteriosus in extremely low birth weight infants. *Neonatology*. 2013;103(3):166-9.
14. Hammerman C, Bin-Nun A, Markovitch E, Schimmel MS, Kaplan M, Fink D. Ductal closure with paracetamol: a surprising new approach to patent ductus arteriosus treatment. *Pediatrics*. 2011;128(6):e1618-21.
15. Oncel MY, Yurttutan S, Uras N, Altug N, Ozdemir R, Ekmen S, et al. An alternative drug (paracetamol) in the management of patent ductus arteriosus in ibuprofen-resistant or contraindicated preterm infants. *Arch Dis Child Fetal Neonatal Ed*. 2013;98(1):F94.
16. Yurttutan S, Oncel MY, Arayici S, Uras N, Altug N, Erdeve O, et al. A different first-choice drug in the medical management of patent ductus arteriosus: oral paracetamol. *J Matern Fetal Neonatal Med*. 2013;26(8):825-7.
17. Sinha R, Negi V, Dalal SS. An Interesting Observation of PDA Closure with Oral Paracetamol in Preterm Neonates. *J Clin Neonatol*. 2013;2(1):30-2.

18. Oncel MY, Yurttutan S, Erdeve O, Uras N, Altug N, Oguz SS, et al. Oral paracetamol versus oral ibuprofen in the management of patent ductus arteriosus in preterm infants: a randomized controlled trial. *J Pediatr*. 2014;164(3):510-4 e1.
19. Dang D, Wang D, Zhang C, Zhou W, Zhou Q, Wu H. Comparison of oral paracetamol versus ibuprofen in premature infants with patent ductus arteriosus: a randomized controlled trial. *PLoS One*. 2013;8(11):e77888.
20. Ohlsson A, Shah PS. Paracetamol (acetaminophen) for patent ductus arteriosus in preterm or low-birth-weight infants. *Cochrane Database Syst Rev*. 2015(3):CD010061.
21. Terrin G, Conte F, Oncel MY, Scipione A, McNamara PJ, Simons S, et al. Paracetamol for the treatment of patent ductus arteriosus in preterm neonates: a systematic review and meta-analysis. *Arch Dis Child Fetal Neonatal Ed*. 2016;101(2):F127-36.
22. Oncel MY, Eras Z, Uras N, Canpolat FE, Erdeve O, Oguz SS. Neurodevelopmental Outcomes of Preterm Infants Treated with Oral Paracetamol Versus Ibuprofen for Patent Ductus Arteriosus. *Am J Perinatol*. 2017.
23. Lin XZ, Chen HQ, Zheng Z, Li YD, Lai JD, Huang LH. [Therapeutic effect of early administration of oral ibuprofen in very low birth weight infants with patent ductus arteriosus]. *Zhongguo Dang Dai Er Ke Za Zhi*. 2012;14(7):502-5.

**Authors' contributions:**

Ashutosh Kumar (AK) assisted in designing and planning the study and wrote the first draft of the protocol

Venkateshan Sundaram (VS) conceived the idea, designed the trial and critically edited and approved the manuscript.

Tejopratap Oleti (TO) assisted in planning the study and critically edited and approved the manuscript

Srinivas Murki (SM) assisted in designing and planning the study and critically edited and approved the manuscript

Arun Krishna (ArK) assisted in planning the study and wrote the first draft of the protocol

Mangalabharathi Sundaram (MS) assisted in designing and planning the study and critically edited and approved the manuscript

Shivsajan Saini (SS) assisted in planning the study and critically edited and approved the manuscript

Sourabh Dutta (SD) assisted in designing and planning the study and critically edited and approved the manuscript

**Funding statement:** This study and the manuscript did not attract funding from any source

**Competing interests statement:** All the authors certify that they do not have any conflicts of or competing interest in the manuscript

**Data sharing:** No additional unpublished data is available. Data that is being collected can be accessed by one of the site investigator (VS, SM and MS) and they should be preferably contacted through the corresponding author to obtain the data.

1  
2  
3  
4  
5  
6  
7  
8  
9  
10  
11  
12  
13  
14  
15  
16  
17  
18  
19  
20  
21  
22  
23  
24  
25  
26  
27  
28  
29  
30  
31  
32  
33  
34  
35  
36  
37  
38  
39  
40  
41  
42  
43  
44  
45  
46  
47  
48  
49  
50  
51  
52  
53  
54  
55  
56  
57  
58  
59  
60

Figure 1: Study flow as per the CONSORT recommendations

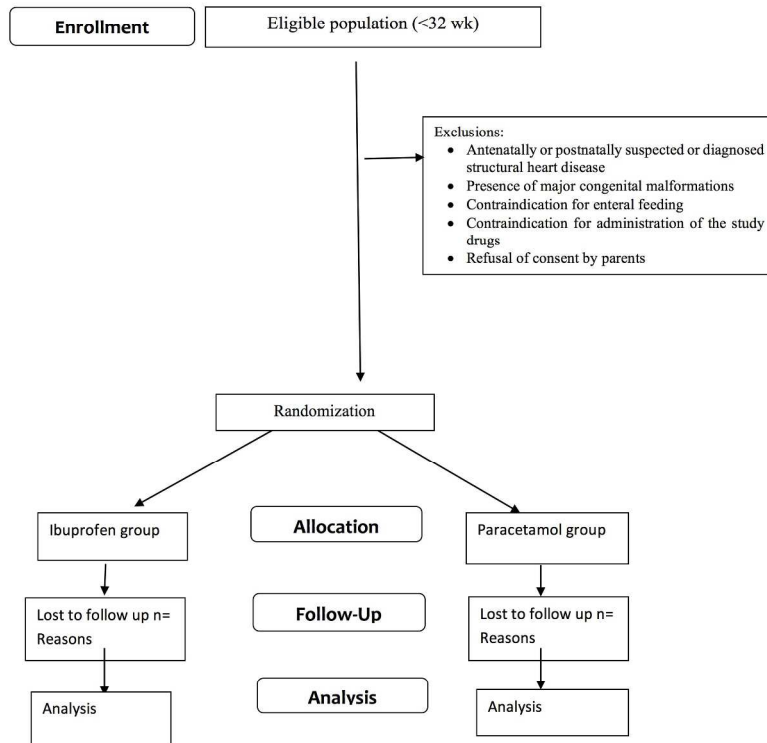

215x279mm (300 x 300 DPI)

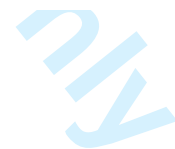

1  
2  
3  
4  
5  
6  
7  
8  
9  
10  
11  
12  
13  
14  
15  
16  
17  
18  
19  
20  
21  
22  
23  
24  
25  
26  
27  
28  
29  
30  
31  
32  
33  
34  
35  
36  
37  
38  
39  
40  
41  
42  
43  
44  
45  
46  
47  
48  
49  
50  
51  
52  
53  
54  
55  
56  
57  
58  
59  
60**Figure 2: Operational flow and time line of the study**

Step 1: Eligible neonate (<32 weeks with clinical signs suggestive of HS-PDA and in the first 2 weeks of age or directly screened for Echo proven HS-PDA) identified and first Echo done (Zero-hour echo)

Step 2: Structural abnormality of heart ruled out by the investigators (even suspicion of a structural heart disease would make them not eligible)

Step 3: Exclusion criteria applied (certain investigations like platelet count and renal function tests – sent and results acquired within the next 6 hours)

Step 4: Randomized to one of the study groups (time of randomization in hours and the age at diagnosis - age at randomization difference noted)

Step 5: Study drug administered as per the random allocation (the age at intervention and the randomization – intervention interval noted)

Step 6: Repeat echo's (Echo 1, 2, and 3) done at  $24 \pm 4$  hours' interval) on 1<sup>st</sup>, 2<sup>nd</sup>, and 3<sup>rd</sup> day drug dose for closure of PDA

Step 7: If Ductus still open on Echo 3, repeat course of the same study drug of same duration would be started and the Echo would be repeated as per the first course schedule

Step 8: The Ductus would be finally labeled as failed to close based on Echo 6, which would be done at the end of the last dose of the second course of the study drug

Note: The first course would be completed even though a ductal closure is documented earlier. However, if a baby required a second course, the drug would be stopped the moment a ductal closure has been documented at any point during the daily Echocardiographic assessments

215x279mm (300 x 300 DPI)

BMJ

1  
2  
3  
4  
5  
6  
7  
8  
9  
10  
11  
12  
13  
14  
15  
16  
17  
18  
19  
20  
21  
22  
23  
24  
25  
26  
27  
28  
29  
30  
31  
32  
33  
34  
35  
36  
37  
38  
39  
40  
41  
42  
43  
44  
45  
46  
47  
48  
49  
50  
51  
52  
53  
54  
55  
56  
57  
58  
59  
60

**Figure 3: Time line of assessments by Bedside Echocardiography**

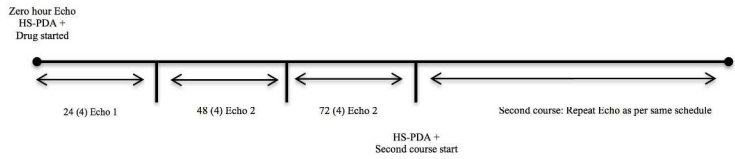

215x279mm (300 x 300 DPI)

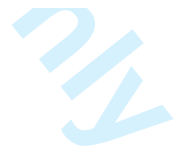

Supplement: bmjpo-2017-000143.draft_revisions.pdf [file bmjpo-2017-000143.draft_revisions.pdf]
